# Supplementary material
Source: PubMed Central journal article supplement (PMC4183165)
Supplement: supp_2.3.E153_2014-0008_original_submission.pdf [file supp_2.3.E153_2014-0008_original_submission.pdf]

**Time to Wake Up: Evidence from British Columbia for implementing Take Home Naloxone programs in Canada**

|                               |                                                                                                                                                                                                                                                                                                                                                                                                                                                                                                                                                                                                                                                                                                                                                                                                                                                                                                                                                                                                                                                                                                                                                                                                                                                                                                                                                                                                                                                                                                                                                                                                                                                                                                 |
|-------------------------------|-------------------------------------------------------------------------------------------------------------------------------------------------------------------------------------------------------------------------------------------------------------------------------------------------------------------------------------------------------------------------------------------------------------------------------------------------------------------------------------------------------------------------------------------------------------------------------------------------------------------------------------------------------------------------------------------------------------------------------------------------------------------------------------------------------------------------------------------------------------------------------------------------------------------------------------------------------------------------------------------------------------------------------------------------------------------------------------------------------------------------------------------------------------------------------------------------------------------------------------------------------------------------------------------------------------------------------------------------------------------------------------------------------------------------------------------------------------------------------------------------------------------------------------------------------------------------------------------------------------------------------------------------------------------------------------------------|
| Journal:                      | <i>CMAJ</i>                                                                                                                                                                                                                                                                                                                                                                                                                                                                                                                                                                                                                                                                                                                                                                                                                                                                                                                                                                                                                                                                                                                                                                                                                                                                                                                                                                                                                                                                                                                                                                                                                                                                                     |
| Manuscript ID:                | CMAJ-13-1874                                                                                                                                                                                                                                                                                                                                                                                                                                                                                                                                                                                                                                                                                                                                                                                                                                                                                                                                                                                                                                                                                                                                                                                                                                                                                                                                                                                                                                                                                                                                                                                                                                                                                    |
| Manuscript Type:              | Research - Other                                                                                                                                                                                                                                                                                                                                                                                                                                                                                                                                                                                                                                                                                                                                                                                                                                                                                                                                                                                                                                                                                                                                                                                                                                                                                                                                                                                                                                                                                                                                                                                                                                                                                |
| Date Submitted by the Author: | 24-Dec-2013                                                                                                                                                                                                                                                                                                                                                                                                                                                                                                                                                                                                                                                                                                                                                                                                                                                                                                                                                                                                                                                                                                                                                                                                                                                                                                                                                                                                                                                                                                                                                                                                                                                                                     |
| Complete List of Authors:     | Banjo, Oluwajenyo; BC Centre for Disease Control, CDPACS<br>Tzemis, Despina; BC Centre for Disease Control, CDPACS<br>Al-Qutub, Diana; BC Centre for Disease Control, CDPACS<br>Amlani, Ashraf; BC Centre for Disease Control, CDPACS<br>Kesselring, Sarah; BC Centre for Disease Control, CDPACS<br>Buxton, Jane; BC Centre for Disease Control, CDPACS                                                                                                                                                                                                                                                                                                                                                                                                                                                                                                                                                                                                                                                                                                                                                                                                                                                                                                                                                                                                                                                                                                                                                                                                                                                                                                                                        |
| Keywords:                     | Community Medicine, Drugs, Emergency Medicine, Evidence-based Medicine, Family Medicine, General Practice, Primary Care, Rural Health and Medicine                                                                                                                                                                                                                                                                                                                                                                                                                                                                                                                                                                                                                                                                                                                                                                                                                                                                                                                                                                                                                                                                                                                                                                                                                                                                                                                                                                                                                                                                                                                                              |
| More Detailed Keywords:       | drug use, naloxone, overdose reversal, opioid overdose, program evaluation, qualitative research                                                                                                                                                                                                                                                                                                                                                                                                                                                                                                                                                                                                                                                                                                                                                                                                                                                                                                                                                                                                                                                                                                                                                                                                                                                                                                                                                                                                                                                                                                                                                                                                |
| Abstract:                     | <p><b>BACKGROUND:</b> Naloxone saves lives by reversing opioid overdoses. This study evaluates the successes and challenges of the British Columbia Take Home Naloxone (BCTHN) program. We present results and recommendations for those considering implementing similar programs in Canada.</p> <p><b>METHODS:</b> We reviewed program records developed to evaluate the program indicators and generated descriptive statistics. Focus groups and face-to-face interviews were conducted with 40 clients; individual interviews were completed with eight service providers, two police officers and two parents of people who use opioids. Qualitative data were analyzed using content analysis and a qualitative descriptive approach.</p> <p><b>RESULTS:</b> As of December 10, 2013, the BCTHN program has trained 815 participants in overdose prevention, recognition and response, distributed 508 kits and received reports of 52 overdose reversals. Stakeholders were supportive of the program and clients reported greater confidence in overdose response. Service providers found the program training materials easy to use and that training improved client engagement and increased utilization of health care services. Challenges included difficulty identifying physician prescribers, recruiting some at-risk populations (e.g. long-term opioid users and chronic pain patients), and clients' reluctance to call 9-1-1. We also found that the police had misconceptions about take-home-naloxone.</p> <p><b>INTERPRETATION:</b> The BCTHN program is reducing harms and deaths from overdose, is easy to implement and empowers clients. We identified a need</p> |

1  
2  
3  
4  
5  
6  
7  
8  
9  
10  
11  
12  
13  
14  
15  
16  
17  
18  
19  
20  
21  
22  
23  
24  
25  
26  
27  
28  
29  
30  
31  
32  
33  
34  
35  
36  
37  
38  
39  
40  
41  
42  
43  
44  
45  
46  
47  
48  
49  
50  
51  
52  
53  
54  
55  
56  
57  
58  
59  
60

|  |                                                                                                                                                                                                                    |
|--|--------------------------------------------------------------------------------------------------------------------------------------------------------------------------------------------------------------------|
|  | to encourage participation by physicians and some at-risk clients, address misconceptions, and make it conducive for clients to call 9-1-1. It is time to implement THN programs across Canada and save lives now. |
|  |                                                                                                                                                                                                                    |

SCHOLARONE™  
Manuscripts

Confidential

1 The BC Take Home Naloxone Program  
2

3 **Type of Submission:** Research  
4  
5  
6  
7

8 **Title:** Time to Wake Up: Evidence from British Columbia for implementing Take Home Naloxone  
9  
10 programs in Canada  
11  
12  
13  
14  
15  
16

17 **Authors:**

18  
19 Oluwajenyo Banjo<sup>1,2</sup>,MPHc, Despina Tzemis<sup>1</sup>, MPH, Diana Al-Qutub<sup>1,3</sup>, MPH, Ashraf Amlani<sup>1</sup>, MPH, Sarah  
20  
21 Kesselring<sup>1,3</sup>,MPH, Jane A Buxton<sup>1,3</sup> MBBS MHSc  
22  
23

24 *1 – British Columbia Centre for Disease Control*

25  
26 *2 – Faculty of Health Sciences, Simon Fraser University*  
27

28  
29 *3 – School of Population and Public Health, University of British Columbia*  
30

31 Address for all authors: 655 West 12<sup>th</sup> Avenue, Vancouver BC V5Z 4R4  
32  
33  
34

35 Figures: 0; Tables: 4; Abstract: 248 (max=250) Word Count: 2741 (max 2500)  
36  
37  
38  
39

40 Running Head: The BC Take Home Naloxone Program  
41  
42  
43  
44  
45  
46  
47  
48  
49  
50  
51  
52  
53  
54  
55  
56  
57  
58  
59  
60

## The BC Take Home Naloxone Program

**ABSTRACT**

BACKGROUND: Naloxone saves lives by reversing opioid overdoses. This study evaluates the successes and challenges of the British Columbia Take Home Naloxone (BCTHN) program. We present results and recommendations for those considering implementing similar programs in Canada.

METHODS: We reviewed program records developed to evaluate the program indicators and generated descriptive statistics. Focus groups and face-to-face interviews were conducted with 40 clients; individual interviews were completed with eight service providers, two police officers and two parents of people who use opioids. Qualitative data were analyzed using content analysis and a qualitative descriptive approach.

RESULTS: As of December 10, 2013, the BCTHN program has trained 815 participants in overdose prevention, recognition and response, distributed 508 kits and received reports of 52 overdose reversals. Stakeholders were supportive of the program and clients reported greater confidence in overdose response. Service providers found the program training materials easy to use and that training improved client engagement and increased utilization of health care services. Challenges included difficulty identifying physician prescribers, recruiting some at-risk populations (e.g. long-term opioid users and chronic pain patients), and clients' reluctance to call 9-1-1. We also found that the police had misconceptions about take-home-naloxone.

INTERPRETATION: The BCTHN program is reducing harms and deaths from overdose, is easy to implement and empowers clients. We identified a need to encourage participation by physicians and some at-risk clients, address misconceptions, and make it conducive for clients to call 9-1-1. It is time to implement THN programs across Canada and save lives now.

**Key Words**

Drug use; naloxone; opioid overdose; overdose reversal; program evaluation; qualitative research

## The BC Take Home Naloxone Program

### INTRODUCTION

Mortality and morbidity related to opioid overdose is a major public health issue worldwide.[1]

Overdose is the most common cause of death among people who use illicit opioids, and a significant cause of mortality among people prescribed opioids for pain and those prescribed methadone for opioid addiction.[2-4] In 2011, provisional data from the British Columbia (BC) Coroners Service identified 275 drug overdose deaths and the BC Ambulance Service administered naloxone, an opioid antagonist that reverses opioid-related respiratory depression, 2,367 times.[5]

Take Home Naloxone (THN) programs have been implemented to address opioid overdose deaths. In the absence of opioids, naloxone has no pharmacological action or adverse effects and has no market value.[6-8] Naloxone is routinely carried by emergency medical services and has been used to reverse opioid overdose for more than 40 years in Canada.[5] In many countries, including Canada, naloxone is a prescription-only medication but not a controlled substance.[9]

THN programs usually combine overdose training with naloxone distribution. Hundreds of programs exist in Europe, Australia and the United States; the latter has reported over 10,000 overdose reversals since programs started in 1996.[10-13] In Canada, THN programs are relatively new; the first program started in Edmonton in 2005 followed by Toronto in 2011.[14] Both BC and Ontario introduced provincial programs in 2012.[5]

The BCTHN program, developed by the BC Centre for Disease Control (BCCDC) was implemented on August 31, 2012. To participate, sites must identify three key components: an educator, a prescriber, and dispenser and be approved by the regional health authority. Training, which includes overdose prevention, recognition and response, is provided to people who use opioids, their family and friends,

The BC Take Home Naloxone Program

and service providers. However, only people who use opioids can receive a prescription for a naloxone kit.

THN programs that incorporate training with naloxone prescription are cost-effective and reduce overdose deaths.[13;15;16] Although evidence is available from THN programs throughout the world, Canada has unique healthcare and criminal justice settings. We found only one published evaluation of a Canadian THN program (Edmonton); the majority of participants (35 of 50) were lost to follow-up at one year and thus the interpretation of the results are limited.[14]

BC has the only Canadian provincial THN program in continuous operation for over 15 months. This paper describes successes, challenges, and recommendations from the evaluation of the BCTHN program using quantitative and qualitative methods. We present the perspectives of program stakeholders (clients, service providers, police and parents of people who use opioids) and explore concerns and misconceptions. Our results and recommendations are relevant for those considering participation in, and implementation of, THN programs in Canada.

**METHODS**

Ethics approval was obtained from the University of British Columbia and appropriate health authority Research Ethics Boards. A BCTHN community advisory board (CAB) including membership from THN site coordinators, police and people who use drugs was developed.

**Quantitative Component - Review of Program Records:**

Forms were developed to track program indicators, and site coordinators are requested to send these forms to BCCDC regularly. Information about persons trained and kits dispensed are sent at least

1 The BC Take Home Naloxone Program

2  
3 monthly, while naloxone administration forms are requested soon after the event. We entered data  
4  
5 into MS Access 2007, and generated frequencies and means to describe categorical and continuous  
6  
7 variables.  
8  
9

10  
11  
12 **Qualitative study design, participant recruitment and analysis:**  
13

14  
15 Following a literature review and input from CAB members, we developed semi-structured interview  
16  
17 guides for different stakeholder groups: clients (people who use opioids and have received a kit), service  
18  
19 providers, police and parents of people who use opioids. Questions explored perceptions about the  
20  
21 program training, resource materials and implementation, and probed concerns identified in the  
22  
23 literature, such as the ability of people who use opioids to manage overdose situations and seek medical  
24  
25 follow-up after naloxone administration (i.e. call 9-1-1), and the potential for THN to increase risk-taking  
26  
27 behaviours.[17]  
28  
29

30  
31  
32  
33 Focus group and key informant interview participants were recruited from a rural and urban region with  
34  
35 active THN sites; Interior Health and Vancouver Coastal Health (VCH) respectively. Clients aged 19 years  
36  
37 and older, who used opioids and had received training at BCTHN sites in VCH were invited to participate  
38  
39 in either a focus group or an individual face-to-face interview. Clients were offered \$10 honorarium for  
40  
41 their participation. Two investigators conducted each focus group (one moderated the other took field  
42  
43 notes). Service providers at BCTHN sites including nurses, coordinators, and physicians, were invited to  
44  
45 participate through e-mail. The Vancouver Police Department member on the CAB identified front line  
46  
47 officers to interview. Parents of people who use opioids were recruited through parent support groups.  
48  
49  
50 Interviews were conducted over the phone or in person.  
51  
52  
53  
54  
55  
56  
57  
58  
59  
60

## The BC Take Home Naloxone Program

1  
2  
3 Data was collected from November 2012 to June 2013. All focus groups and interviews were audio-  
4  
5 recorded and transcribed verbatim, cleaned of identifying data and organized using QSR NVivo (version  
6  
7 8) software. DA, OB and JB independently analyzed the data using content analysis and a qualitative  
8  
9 descriptive approach which is a low-inference analytic approach.[18] Qualitative description obtains  
10  
11 '*straight and largely unadorned*' answers relevant to, and appreciated by, practitioners and policy  
12  
13 makers. [16]  
14  
15

16  
17  
18  
19 Initial coding was informed by the interview guides but constantly refined as simultaneous collection  
20  
21 and analysis provided new insights that prompted changes in interview guides and analysis. Codes were  
22  
23 grouped into similar descriptive categories which captured variability within and between different  
24  
25 stakeholders. The final themes were agreed upon by the analysis team through consensus. Data  
26  
27 collection from clients and service providers ended when saturation was achieved. The quantitative and  
28  
29 qualitative results were shared with the CAB to validate the findings.  
30  
31  
32  
33  
34

## RESULTS

35  
36  
37 As of December 10, 2013, the program has been implemented in 32 sites in BC, including one hospital  
38  
39 emergency department. Table 1 summarizes the participants trained and kits dispensed. A total of 52  
40  
41 overdose reversals have been reported, although we have only received program records for 45. Table 2  
42  
43 describes data from 43 overdose reversals. Two events were excluded from the analysis as paramedics  
44  
45 arrived before naloxone was administered.  
46  
47  
48

49  
50  
51 Details of the 52 participants in the qualitative interviews are shown in Table 3. Client feedback was  
52  
53 gathered from 4 focus groups and 20 face-to-face interviews; demographic information of the 40  
54  
55 predominantly male clients are shown in Table 4.  
56  
57  
58  
59  
60



## The BC Take Home Naloxone Program

We describe successes, challenges, recommendations, concerns and misconceptions that emerged from the qualitative analysis under the following headings: Program resources, training sessions, client recruitment, THN administration, site implementation challenges, overall perception of the program, and concerns regarding seeking emergency medical assistance.

### **Program Resources**

Service providers found the program website and training materials comprehensive and easy to use.

They reported being able to adapt the training guide to suit client needs and the resources available at their respective sites.

*“[www.towardtheheart.com](http://www.towardtheheart.com) is an incredible website. And it's quite easy to implement the program.” – Coordinator*

*“I typically go based on their [the client] knowledge and so sometimes, I don't follow exactly what's in there and we'll have a discussion.” – Nurse*

Clients and service providers reported that the posters and video ensured clients, especially those with low literacy levels, understood the overdose prevention, recognition and response information.

### **Training Sessions**

Clients and service providers considered the program to be beneficial. Training delivery varied within and between sites: training was individual or group, brief or comprehensive. Most service providers considered individual training as an engagement tool for building relationships and providing other health-related support and individualized information:

*“Groups work fine really. It can go either way but individual I suppose is better. People feel more willing to ask questions.” – Nurse*

The BC Take Home Naloxone Program

1  
2  
3                   *“There’s a lot of things that come out in the training ... one fellow revealed that he*  
4                   *hadn't had a physical exam for 6 years so there are other things, other opportunities to*  
5                   *talk about health issues.” – Nurse*  
6  
7  
8

9  
10 Service providers reported that clients were often confused about the signs of opioid and stimulant  
11 overdoses, which reinforces the need to educate clients about overdose recognition and response.  
12

13 Challenges reported by clients during training included fear of needles and lack of familiarity with the  
14 VanishPoint® syringes. Some clients reported feeling empowered and less anxious about overdose  
15 situations after receiving training and naloxone kits.  
16  
17  
18  
19  
20

21  
22  
23  
24 **Client Recruitment**

25 Clients reported telling their friends about the program. Service providers reported the most common  
26 method of recruitment was word of mouth; some found posters in high traffic areas and “tip cards”  
27 helped recruitment. Chronic pain patients and people who have used opioids for a long time were hard  
28 to recruit.  
29  
30  
31  
32  
33  
34

35  
36                   *“The challenging ones for me hasn't been stigma but it's been ... veteran users that are*  
37                   *sure that they are not going to overdose.” – Nurse*  
38  
39

40 Suggestions for promoting community awareness and increasing reach of the BCTHN program included  
41 involvement of parole officers and methadone prescribers, and increased outreach through harm  
42 reduction facilities, “addiction workers” and support groups. One parent suggested receiving program  
43 information from other parents would encourage parents of people who use opioids to attend training:  
44  
45  
46  
47  
48

49                   *“I think being well informed and hearing from a parent who took the training would be*  
50                   *really helpful.” – Parent*  
51  
52  
53  
54

55  
56  
57 **THN Administration**

## The BC Take Home Naloxone Program

Clients that have administered naloxone felt it was easy to use and were glad they had naloxone available. Two clients told their experience of administering naloxone to a peer who had overdosed:

*“the guy was almost gone ... the ambulance guy said that if we didn't do what we've done [administer naloxone], he wouldn't have made it.” – Clients*

Clients who have not used the kit were confident that they could administer naloxone if the situation arose. Most clients stated they would be unable to use the naloxone on themselves in an emergency and so, told their friends and family where the kit was kept if needed. Clients reported that the instructional steps in the kit helped to reduce anxiety and reminded them of what to do in overdose situations. One client said:

*“You're worried about dealing with the overdose, right, so-- it was useful to get the instructions on the kits themselves.” – Client*

### **Site Implementation Challenges**

Two service providers reported experiencing time limitations and having to adjust other programs to accommodate the BCTHN program:

*“I think it's more to do with [BCTHN] being an emerging practice ... whenever we're adding a special program, that means that we have to balance out some time with all the existing programs that we're doing.” – Physician*

Fiscal constraints were also mentioned as challenges to effective implementation of the BCTHN program. One physician noted that private clinics would need additional financial resources to set up the program and conduct trainings.

Some clinics and agencies interested in implementing THN reported difficulties identifying physicians willing to be prescribers. There was also concern about program sustainability, particularly if a

1 The BC Take Home Naloxone Program

2  
3 prescribing physician withdrew their service:

4  
5 *"If we lose one of those guys, then we're starting from square one again ..."* – Nurse

6  
7  
8  
9  
10 **Overall Perceptions of the Program**

11  
12 Clients, service providers and parents were pleased that the BCTHN program was implemented. One  
13 client said:

14  
15  
16  
17 *"I think it's a really great idea, yeah. Because I could have used it a couple times, you*  
18 *know ... It just feels like forever when they are coming, when you do phone 9-1-1..."* -

19  
20  
21 Client

22  
23  
24 One of the parents also believed making naloxone readily available will not increase risk-taking  
25 behavior:

26  
27  
28 *"I don't see [naloxone] as at all being enabling; I see it as a factor that prevents death or*  
29 *serious brain damage and other harms."* – Parent

30  
31  
32  
33 Police were less accepting of the program stating that the program may be beneficial,  
34 but not in the environment they work in:

35  
36  
37 *"I see the benefits. I definitely see that but for functional addicts not the ones we see."* –

38  
39  
40 Police

41  
42 The police officers were concerned that naloxone may have a market value and thus promote illegal  
43 activities. However, clients reported that naloxone has no market value since it takes away their "high."

44  
45 Some naloxone kits were reported lost during transient housing and others confiscated by the police.

46  
47  
48  
49 *"... a lot of addicts get picked up by the police and these Narcan® [naloxone] kits are*  
50 *just being taken from them."* – Client

1 The BC Take Home Naloxone Program

2  
3 **Concerns regarding seeking emergency medical assistance**

4  
5 Although clients said they were confident about calling 9-1-1 when responding to an overdose, only  
6  
7 about half of those who used the kits reported calling. The main reasons identified for not calling 9-1-1  
8  
9 were the belief that the person who overdosed would fully recover after naloxone administration and  
10  
11 fear of police involvement:  
12

13  
14 *“She [person who administered naloxone] wanted to call 9-1-1, she said and then,*  
15  
16 *everybody who was there was afraid of a drug bust so they didn't.”*

17  
18  
19 – Nurse

20  
21 The police were also concerned that clients may become overconfident and fail to get medical attention  
22  
23 following an overdose.

24  
25 *“Follow-up is the biggest [concern] ... I wouldn't count on them [people who use drugs] to call 9-  
26  
27 1-1.”* – Police

28  
29  
30 When findings were shared with the CAB, members confirmed police had confiscated some kits. To  
31  
32 address this issue, the BCCDC produced a one-page illustrated information sheet to inform police about  
33  
34 the program.[19] At a subsequent CAB meeting in November 2013, members shared hearing no recent  
35  
36 reports of kit confiscation.  
37  
38

39  
40  
41  
42 **INTERPRETATION**

43  
44 Stakeholders interviewed were generally supportive of the BCTHN program. People who use drugs were  
45  
46 successfully trained in the BCTHN, which is consistent with most other THN evaluations in the  
47  
48 literature.[16;17;20;21] As in studies elsewhere, clients reported feeling empowered, having more  
49  
50 confidence in responding to overdose events and no increase in drug use or risk-taking  
51  
52 behaviors.[6;13;16;21-24] Symptoms of withdrawal or aggression after naloxone administration was  
53  
54 uncommon, although more than 40% of individuals received two or more ampoules of naloxone. This  
55  
56  
57  
58  
59  
60

1 The BC Take Home Naloxone Program

2  
3 helps address concerns that naloxone administration in community settings will trigger withdrawal and  
4  
5 aggression.  
6

7  
8  
9  
10 Service providers interviewed reported training increased client engagement and utilization of health  
11  
12 care services. This was found in other studies; a Chicago study reported THN program participants  
13  
14 increased their use of health services leading to improved personal care and safer practices.[13] BCTHN  
15  
16 service providers found the program easy to implement but experienced time and fiscal constraints.  
17  
18 However, despite these constraints, the program was identified as a priority which should expand  
19  
20 throughout BC and to various high-risk groups.[25]  
21  
22

23  
24  
25  
26 Service providers described difficulties engaging people with long-term opioid use, as they may  
27  
28 underestimate their personal risk and believe they have adopted sufficient harm reduction strategies to  
29  
30 prevent overdose. As illicit drugs are unregulated, unknown potency and constituents contribute to the  
31  
32 risk of overdose. For example in BC, an increase in overdose deaths was associated with more potent  
33  
34 heroin in 2011 , and in May 2013 powdered fentanyl was reportedly being sold as heroin.[26;27]  
35  
36  
37

38  
39  
40 Service providers noted that patients prescribed opioids for chronic pain were also reluctant to receive  
41  
42 naloxone as they did not perceive themselves at risk of overdose (because the opioid was physician-  
43  
44 prescribed) and were concerned with being labeled a 'drug user'. However those prescribed opioids may  
45  
46 be at increased overdose risk due to respiratory, renal or liver disease and may be prescribed other  
47  
48 depressant drugs.[25;28-30] Education about overdose risks may reduce stigma about drug use and  
49  
50 encourage chronic pain patients to accept naloxone kits.  
51  
52  
53  
54  
55  
56  
57  
58  
59  
60

## The BC Take Home Naloxone Program

1  
2  
3 Police officers had reservations and misconceptions about the BCTHN program and several clients  
4 reported police confiscating kits. We found, similar to other regions, that clients were concerned about  
5 police involvement after calling 9-1-1.[16;22] Therefore, it is important that local police are engaged to  
6 address concerns and make it more conducive for people to call emergency health services in overdose  
7 events without fear of prosecution.[10;12;22;31;32;33]. Canada could consider implementing a Good  
8 Samaritan law similar to that in 10 US states, which protects the bystander and the overdose victim from  
9 prosecution for drug possession.[31] The BCTHN training continues to reinforce the importance of  
10 calling 9-1-1 because naloxone has a shorter half-life than many opioids and the overdose may recur.  
11  
12  
13  
14  
15  
16  
17  
18  
19  
20  
21  
22  
23

### Limitations

24 We present a range of participants' opinions; however our subjective experiences may play a role in the  
25 quotes chosen and ideas presented. Opinions expressed by study participants may differ from those of  
26 the general community as they were a convenience sample selected from those currently enrolled in the  
27 BCTHN program and may have been most supportive of the BCTHN program.  
28  
29  
30  
31  
32  
33  
34  
35  
36  
37

### CONCLUSION

38 The BCTHN program is reducing harms and deaths from overdose, is easy to implement and empowers  
39 clients. However there are time and fiscal constraints and the program is reliant on engaging and  
40 retaining prescribers. Stakeholder concerns and misconceptions should be addressed, and people who  
41 use opioids encouraged to contact emergency health services during overdose events. THN programs  
42 are acceptable and effective in Canadian settings; it is time to implement THN programs across Canada  
43 and save lives now.  
44  
45  
46  
47  
48  
49  
50  
51  
52  
53  
54

### ACKNOWLEDGEMENTS

1  
2  
3  
4  
5  
6  
7  
8  
9  
10  
11  
12  
13  
14  
15  
16  
17  
18  
19  
20  
21  
22  
23  
24  
25  
26  
27  
28  
29  
30  
31  
32  
33  
34  
35  
36  
37  
38  
39  
40  
41  
42  
43  
44  
45  
46  
47  
48  
49  
50  
51  
52  
53  
54  
55  
56  
57  
58  
59  
60

The BC Take Home Naloxone Program

We appreciate the support of the BC Centre for Disease Control (an agency of the Provincial Health Services Authority) and the BC Ministry of Health in implementing this program. We would like to acknowledge the assistance of Erin Gibson, Dylan Collins, Kristy Williams, program clients and staff, study participants and the members of the BCTHN Community Advisory Board. No external funding was needed for this study.

Confidential



## The BC Take Home Naloxone Program

## Reference List

- (1) Guidelines for the psychosocially assisted pharmacological treatment of opioid dependence. 2009. World Health Organization.
- (2) Coplehorn JR, Dalton MS, Haldar F, Petrenas AM, Nisbet JG. Methadone maintenance and addicts' risk of fatal heroin overdose. *Subst Use Misuse* 1996; 31(2):177-196.
- (3) Degenhardt L, Bucello C, Mathers B, Briegleb C, Ali H, Hickman M et al. Mortality among regular or dependent users of heroin and other opioids: a systematic review and meta-analysis of cohort studies. *Addiction* 2011; 106(1):32-51.
- (4) Dunn KM, Saunders KW, Rutter CM, Banta-Green CJ, Merrill JO, Sullivan MD et al. Opioid prescriptions for chronic pain and overdose: a cohort study. *Ann Intern Med* 2010; 152(2):85-92.
- (5) Take Home Naloxone: Background. 2012. BC Centre for Disease Control.
- (6) Darke S, Hall W. The distribution of naloxone to heroin users. *Addiction* 1997; 92(9):1195-1199.
- (7) Badewitz-Dodd LH. MIMS Annual 1995, Australian Edition. 19th ed. Sydney: Griffin Press, 1995.
- (8) Groeger JS, Inturrisi CE. High-dose naloxone: pharmacokinetics in patients in septic shock. *Crit Care Med* 1987; 15(8):751-756.
- (9) Baca CT, Grant KJ. Take-home naloxone to reduce heroin death. *Addiction* 2005; 100(12):1823-1831.
- (10) Community-based opioid overdose prevention programs providing naloxone - United States, 2010. *MMWR Morb Mortal Wkly Rep* 2012; 61(6):101-105.
- (11) Coffin PO, Sullivan SD. Cost-effectiveness of distributing naloxone to heroin users for lay overdose reversal in Russian cities. *J Med Econ* 2013; 16(8):1051-1060.
- (12) Tobin KE, Sherman SG, Beilenson P, Welsh C, Latkin CA. Evaluation of the Staying Alive programme: training injection drug users to properly administer naloxone and save lives. *Int J Drug Policy* 2009; 20(2):131-136.
- (13) Maxwell S, Bigg D, Stanczykiewicz K, Carlberg-Racich S. Prescribing naloxone to actively injecting heroin users: a program to reduce heroin overdose deaths. *J Addict Dis* 2006; 25(3):89-96.
- (14) Dong KA, Taylor M, Willa-Roel C, Rose MSG, Rowe GA. Community-based naloxone: A Canadian pilot program. *Canadian Journal of Addiction Medicine* 2012; 3(2):4-9.
- (15) Coffin PO, Sullivan SD. Cost-effectiveness of distributing naloxone to heroin users for lay overdose reversal. *Ann Intern Med* 2013; 158(1):1-9.

## The BC Take Home Naloxone Program

- 1  
2  
3 (16) Piper TM, Stancliff S, Rudenstine S, Sherman S, Nandi V, Clear A et al. Evaluation of a naloxone  
4 distribution and administration program in New York City. *Subst Use Misuse* 2008; 43(7):858-  
5 870.
- 6  
7  
8 (17) McAuley A, Best D, Taylor A, Hunter C, Robertson R. From evidence to policy: The Scottish  
9 national naloxone programme. *Drugs: Education, Prevention & Policy* 2012; 19(4):309-319.
- 10  
11 (18) Sandelowski M. Whatever happened to qualitative description? *Res Nurs Health* 2000;  
12 23(4):334-340.
- 13  
14 (19) BC Centre for Disease Control: Overdose Prevention Kit. 2013. BC Centre for Disease Control.
- 15  
16  
17 (20) Dettmer K, Saunders B, Strang J. Take home naloxone and the prevention of deaths from opiate  
18 overdose: two pilot schemes. *BMJ* 2001; 322(7291):895-896.
- 19  
20  
21 (21) Green TC, Heimer R, Grau LE. Distinguishing signs of opioid overdose and indication for  
22 naloxone: an evaluation of six overdose training and naloxone distribution programs in the  
23 United States. *Addiction* 2008; 103(6):979-989.
- 24  
25  
26 (22) Seal KH, Downing M, Kral AH, Singleton-Banks S, Hammond JP, Lorvick J et al. Attitudes about  
27 prescribing take-home naloxone to injection drug users for the management of heroin  
28 overdose: a survey of street-recruited injectors in the San Francisco Bay Area. *J Urban Health*  
29 2003; 80(2):291-301.
- 30  
31 (23) Bennett T, Holloway K. The impact of take-home naloxone distribution and training on opiate  
32 overdose knowledge and response: an evaluation of the THN project in Wales. *Drugs: Education,*  
33 *Prevention & Policy* 2012; 19(4):320-328.
- 34  
35 (24) Eggertson L. Take-home naloxone kits preventing overdose deaths. *CMAJ* 2013.
- 36  
37 (25) Albert S, Brason FW, Sanford CK, Dasgupta N, Graham J, Lovette B. Project Lazarus: community-  
38 based overdose prevention in rural North Carolina. *Pain Med* 2011; 12 Suppl 2:S77-S85.
- 39  
40 (26) BC Coroners Service warns of rise in heroin-related deaths. 2011. BC Coroners Service, Ministry  
41 of Public Safety and Solicitor General.
- 42  
43 (27) Spike in fatal fentanyl overdoses sparks warning in B.C. CBC News . 5-31-2013.
- 44  
45  
46 (28) Unintentional poisoning deaths--United States, 1999-2004. *MMWR Morb Mortal Wkly Rep*  
47 2007; 56(5):93-96.
- 48  
49 (29) Hall AJ, Logan JE, Toblin RL, Kaplan JA, Kraner JC, Bixler D et al. Patterns of abuse among  
50 unintentional pharmaceutical overdose fatalities. *JAMA* 2008; 300(22):2613-2620.
- 51  
52 (30) Corneil T, Elefante J, y-Hadford J, odison K, rris B. Non-illicit, non-methadone, prescription opiate  
53 overdose deaths in BC's interior region: Findings from a retrospective case series, 2006-2011.  
54 2012. British Columbia Interior Health Alert.
- 55  
56  
57  
58  
59  
60

## The BC Take Home Naloxone Program

- 1  
2  
3  
4  
5  
6  
7  
8  
9  
10  
11  
12  
13  
14  
15  
16  
17  
18  
19  
20  
21  
22  
23  
24  
25  
26  
27  
28  
29  
30  
31  
32  
33  
34  
35  
36  
37  
38  
39  
40  
41  
42  
43  
44  
45  
46  
47  
48  
49  
50  
51  
52  
53  
54  
55  
56  
57  
58  
59  
60
- (31) Bennett AS, Bell A, Tomedi L, Hulsey EG, Kral AH. Characteristics of an overdose prevention, response, and naloxone distribution program in Pittsburgh and Allegheny County, Pennsylvania. *J Urban Health* 2011; 88(6):1020-1030.
- (32) Enteen L, Bauer J, McLean R, Wheeler E, Hurliaux E, Kral AH et al. Overdose prevention and naloxone prescription for opioid users in San Francisco. *J Urban Health* 2010; 87(6):931-941.
- (33) Davis C, Webb D, Burris S. Changing law from barrier to facilitator of opioid overdose prevention. *J Law Med Ethics* 2013; 41 Suppl 1:33-36.

Confidential

## The BC Take Home Naloxone Program

**Table 1. Description of participants trained to prevent, recognize & respond to opioid overdose, and THN kits dispensed.**

|                         | Count | Percent |
|-------------------------|-------|---------|
| Participants Trained    | 815   | 100     |
| Type of trainee:        |       |         |
| People who use opioids  | 508   | 62.3    |
| Staff & Volunteers      | 235   | 28.8    |
| Friends and family      | 72    | 8.8     |
| Kits Dispensed          | 583   | 100     |
| 1 <sup>st</sup> time    | 498   | 85.4    |
| Replacements            | 76    | 13.0    |
| Unspecified             | 9     | 1.5     |
| Reason for Replacement: |       |         |
| Used                    | 33    | 43.4    |
| Lost                    | 12    | 15.8    |
| Stolen                  | 11    | 14.5    |
| Confiscated             | 4     | 5.3     |
| Expired                 | 2     | 2.6     |
| Unspecified             | 14    | 18.4    |

## The BC Take Home Naloxone Program

**Table 2. THN administration information from program records**

|                |                                               | Count<br>(n = 43) | Percent |
|----------------|-----------------------------------------------|-------------------|---------|
| Administered   |                                               |                   |         |
|                | to 3rd party by person who was prescribed kit | 28                | 65.1%   |
|                | to self by person who was prescribed kit      | 2                 | 4.7%    |
|                | to person who was prescribed kit by 3rd party | 2                 | 4.7%    |
|                | Unknown                                       | 11                | 25.6%   |
| Location of OD |                                               |                   |         |
|                | Private residence                             | 28                | 65.1%   |
|                | On the street                                 | 7                 | 16.3%   |
|                | Supportive housing                            | 3                 | 7.0%    |
|                | Hotel                                         | 2                 | 4.7%    |
|                | Other                                         | 2                 | 4.7%    |
|                | Shelter                                       | 0                 | 0.0%    |
|                | Not answered                                  | 1                 | 2.3%    |
| Drugs involved |                                               |                   |         |
|                | Heroin                                        | 41                | 95.3%   |
|                | Fentanyl                                      | 7                 | 16.3%   |
|                | Methamphetamine                               | 4                 | 9.3%    |
|                | Methadone                                     | 4                 | 9.3%    |
|                | Cocaine/crack                                 | 3                 | 7.0%    |
|                | Benzodiazepines                               | 3                 | 7.0%    |

## The BC Take Home Naloxone Program

|                                       |              |    |       |
|---------------------------------------|--------------|----|-------|
|                                       | Morphine     | 2  | 4.7%  |
|                                       | Alcohol      | 2  | 4.7%  |
|                                       | Codeine      | 1  | 2.3%  |
|                                       | Oxycodone    | 1  | 2.3%  |
|                                       | Other        | 4  | 9.3%  |
|                                       | Not answered | 0  | 0.0%  |
| Symptoms of withdrawal                |              |    |       |
|                                       | None         | 23 | 53.5% |
|                                       | Mild         | 9  | 20.9% |
|                                       | Severe       | 4  | 9.3%  |
|                                       | Not answered | 7  | 16.3% |
| Display aggression                    |              |    |       |
|                                       | Yes          | 6  | 14.0% |
|                                       | No           | 26 | 60.5% |
|                                       | Not answered | 11 | 25.6% |
| Ampoules administered (0.4mg/ml each) |              |    |       |
|                                       | 1            | 18 | 41.9% |
|                                       | 2            | 18 | 41.9% |
|                                       | 3            | 1  | 2.3%  |
|                                       | Not answered | 6  | 14.0% |
| 911 called                            |              |    |       |
|                                       | Yes          | 19 | 44.2% |
|                                       | No           | 24 | 55.8% |

## The BC Take Home Naloxone Program

|                                      |                                     |   |       |
|--------------------------------------|-------------------------------------|---|-------|
|                                      | Not answered                        | 0 | 0.0%  |
| If not called, why (n=24)            |                                     |   |       |
|                                      | Worried about police involvement    | 6 | 25.0% |
|                                      | Thought person would recover on own | 9 | 37.5% |
|                                      | Not answered                        | 9 | 37.5% |
| If called, did police attend? (n=19) |                                     |   |       |
|                                      | Yes                                 | 9 | 47.4% |
|                                      | No                                  | 7 | 36.8% |
|                                      | Not answered                        | 3 | 15.8% |

Confidential

## The BC Take Home Naloxone Program

Table 3. Demographic characteristics of all Interviewees

|                             | N         | Sex    |      |         | Health Region        |          |
|-----------------------------|-----------|--------|------|---------|----------------------|----------|
|                             |           | Female | Male | Unknown | Vancouver<br>Coastal | Interior |
| <b>Clients*</b>             | <b>40</b> | 11     | 24   | 5       | 40                   | 0        |
| <b>Service providers</b>    |           |        |      |         |                      |          |
| Physician                   | 2         | 1      | 1    | -       | 1                    | 1        |
| Coordinator                 | 2         | 1      | 1    | -       | 1                    | 1        |
| Educator (registered nurse) | 4         | 4      | -    | -       | 3                    | 1        |
| <b>Police</b>               | <b>2</b>  | 1      | 1    | -       | 2                    | 0        |
| <b>Parent</b>               | <b>2</b>  | 2      | 0    | -       | 2                    | 0        |
| <b>Total</b>                | <b>52</b> | 20     | 27   | 5       | 49                   | 3        |

\*Clients are people who use opioids and received a kit and participated in focus group and individual interviews



## The BC Take Home Naloxone Program

**Table 4. Demographic characteristics of Clients\***

| <b>Variable</b>                          | <b>Totals (%)</b><br><b>N=35*</b> |
|------------------------------------------|-----------------------------------|
| <b>Sex</b>                               |                                   |
| Female                                   | 11 (31)                           |
| Male                                     | 24 (69)                           |
| <b>Age years</b>                         |                                   |
| Mean (range)                             | 45 (24 - 61)                      |
| Female: mean (range)                     | 47 (33 - 61)                      |
| Male: mean (range)                       | 45 (24 - 61)                      |
| <b>Highest Education Level</b>           |                                   |
| No Schooling                             | 1 (3)                             |
| Primary                                  | 2 (6)                             |
| Secondary                                | 19 (54)                           |
| Post-secondary                           | 13 (37)                           |
| <b>Duration of Drug Use years</b>        |                                   |
| Mean (range)                             | 19 (0.33 - 45)                    |
| * Five (5) participants had missing data |                                   |

\* Clients are people who use opioids and received a kit and participated in focus group and individual interviews
